# Supplementary material for: Fibrotic Response of Human Trabecular Meshwork Cells to Transforming Growth Factor-Beta 3 and Autotaxin in Aqueous Humor
Source: MDPI journal article supplement (doi:10.3390/biom12091231), 2022-09-03
Supplement: s1 [file s1]

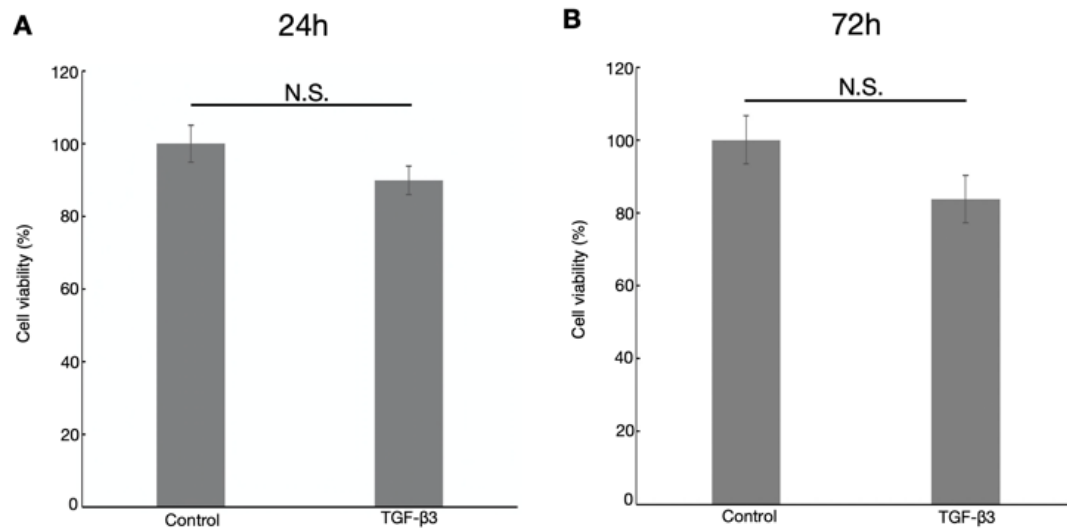

**Supplementary Figure S1.** HTM cell viability assay after stimulation with TGF- $\beta$ 3 at the concentration of 100 ng/mL for (A) 24 h and (B) 72 h. The results showed that treated with 100 ng/mL TGF- $\beta$ 3 for 24 h did not induce significant changes in HTM cells viability. Stimulation of 100 ng/mL TGF- $\beta$ 3 for 72 h did not induce significant changes in cells viability compared to the control group. Data are presented as the mean  $\pm$  standard deviation,  $n = 4$ .
